# Supplementary material for: Pt/Al2O3 coated with N-doped carbon as a highly selective and stable catalyst for catalytic hydrogenation of p-chloronitrobenzene to p-chloroaniline
Source: Royal Society of Chemistry journal article supplement (doi:10.1039/d0ra01578d), 2020-01-01

**supplementary information**

for

**Pt/Al<sub>2</sub>O<sub>3</sub> coated with N-doped carbon as highly selective and stable catalyst for  
catalytic hydrogenation of *p*-chloronitrobenzene to *p*-chloroaniline**

Donghong Zhu, Xin Weng, Yuqiong Tang, Jingya Sun\*, Shourong Zheng, Zhaoyi Xu

*State Key Laboratory of Pollution Control and Resource Reuse, School of the  
Environment, Nanjing University, Nanjing 210046, China*

\*Corresponding author. Tel: +86-25-89680373; Fax: +86-25-89680596.

*E-mail:* sunsun1118@126.com

(Summary of Content: 2 pages, 1 figure)

**Fig. S1.** HAADF-STEM images of (a) Pt/Al<sub>2</sub>O<sub>3</sub>, (b) Pt/Al<sub>2</sub>O<sub>3</sub>@NC-10, (c) Pt/Al<sub>2</sub>O<sub>3</sub>@NC-15 and (d) Pt/Al<sub>2</sub>O<sub>3</sub>@NC-25

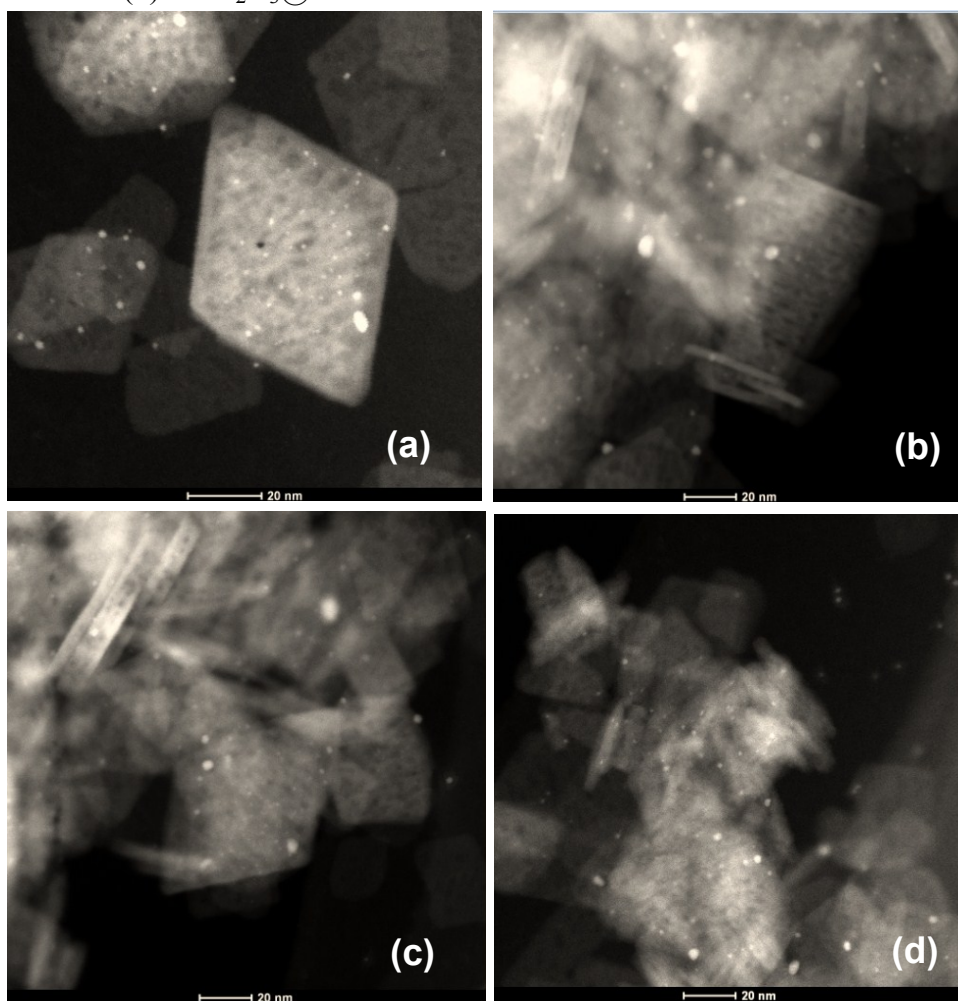

Supplement: d0ra01578d1.pdf [file d0ra01578d1.pdf]
